# Supplementary material for: Effects of anthocyanin supplementation on blood lipid levels: a systematic review and meta-analysis
Source: PubMed Central journal article supplement (PMC10463756; doi:10.3389/fnut.2023.1207751), 2023-08-15
Supplement: Data_Sheet_1.pdf [file Data_Sheet_1.pdf]

## *Supplementary Material*

# **Effects of Anthocyanin Supplementation on Blood Lipid Levels: A Systematic Review and Meta-Analysis**

Hwan-Hee Jang, In-Guk Hwang, Young-Min Lee\*

\* **Correspondence:** Young-Min Lee: ymlee@ginue.ac.kr

### **1 Supplementary Tables**

**Supplementary Table 1. Quality assessment criteria used to assess the final 41 studies included in the systematic review**

| <b>Study</b>          | <b>Randomization</b> | <b>Method of randomization described and appropriate</b> | <b>Blinding mentioned</b> | <b>Method of blinding described and appropriate</b> | <b>Withdrawal and dropout of participants described</b> | <b>Total</b> |
|-----------------------|----------------------|----------------------------------------------------------|---------------------------|-----------------------------------------------------|---------------------------------------------------------|--------------|
| Murkovic et al. 2004  | 1                    | 0                                                        | 1                         | 0                                                   | 1                                                       | 3            |
| Hansen et al. 2005    | 1                    | 0                                                        | 1                         | 1                                                   | 1                                                       | 4            |
| Zern et al. 2005      | 1                    | 0                                                        | 0                         | 0                                                   | 0                                                       | 1            |
| Cerda' et al. 2006    | 1                    | 0                                                        | 1                         | 1                                                   | 0                                                       | 3            |
| Karlsen et al. 2007   | 1                    | 0                                                        | 0                         | 0                                                   | 0                                                       | 1            |
| Erlund et al. 2008    | 1                    | 0                                                        | 0                         | 0                                                   | 1                                                       | 2            |
| Curtis et al. 2009    | 1                    | 0                                                        | 1                         | 1                                                   | 1                                                       | 4            |
| Qin et al. 2009       | 1                    | 0                                                        | 1                         | 1                                                   | 1                                                       | 4            |
| Basu et al. 2010      | 1                    | 0                                                        | 0                         | 0                                                   | 1                                                       | 2            |
| Stull et al. 2010     | 1                    | 0                                                        | 1                         | 1                                                   | 1                                                       | 4            |
| Basu et al. 2011      | 1                    | 0                                                        | 1                         | 0                                                   | 1                                                       | 3            |
| Dohadwala et al. 2011 | 1                    | 0                                                        | 1                         | 1                                                   | 1                                                       | 4            |

|                        |   |   |   |   |   |   |
|------------------------|---|---|---|---|---|---|
| Zhu et al. 2011        | 1 | 0 | 1 | 0 | 1 | 3 |
| Hassellund et al. 2013 | 1 | 1 | 1 | 1 | 1 | 5 |
| Riso et al. 2013       | 1 | 1 | 1 | 1 | 1 | 5 |
| Flammer et al. 2013    | 1 | 0 | 1 | 1 | 0 | 3 |
| Wright et al. 2013     | 1 | 0 | 1 | 1 | 1 | 4 |
| Zhu et al. 2013        | 1 | 1 | 1 | 0 | 1 | 4 |
| Basu et al. 2014       | 1 | 0 | 0 | 0 | 1 | 2 |
| Lynn et al. 2014       | 1 | 1 | 0 | 0 | 1 | 3 |
| Soltani et al. 2014    | 1 | 1 | 1 | 1 | 1 | 5 |
| Li et al., 2015        | 1 | 0 | 1 | 1 | 0 | 3 |
| Novotny et al. 2015    | 1 | 1 | 1 | 1 | 1 | 5 |
| Soltani et al. 2015    | 1 | 0 | 1 | 1 | 1 | 4 |
| Stull et al. 2015      | 1 | 1 | 1 | 1 | 1 | 5 |
| Zhang et al. 2015      | 1 | 1 | 1 | 1 | 1 | 5 |
| Lee et al. 2016        | 1 | 1 | 1 | 0 | 1 | 4 |
| Zhang et al. 2016      | 1 | 0 | 1 | 0 | 1 | 3 |
| Xie et al. 2017        | 1 | 1 | 1 | 1 | 1 | 5 |
| Yang et al. 2017b      | 1 | 1 | 1 | 1 | 1 | 5 |
| Hollands et al. 2018   | 1 | 1 | 0 | 0 | 1 | 3 |
| Kim et al. 2018        | 1 | 0 | 1 | 1 | 1 | 4 |
| Bakuradze et al. 2019  | 1 | 0 | 0 | 0 | 1 | 2 |
| Curtis et al. 2019     | 1 | 1 | 1 | 1 | 1 | 5 |
| Guo et al. 2020        | 1 | 1 | 1 | 1 | 1 | 5 |
| Stote et al. 2020      | 1 | 1 | 1 | 0 | 1 | 4 |
| Chan et al. 2021       | 1 | 1 | 1 | 1 | 1 | 5 |
| Sekikawa et al. 2021   | 1 | 1 | 1 | 1 | 1 | 5 |
| Xu et al. 2021         | 1 | 1 | 1 | 1 | 1 | 5 |
| Yang et al. 2021       | 1 | 1 | 1 | 1 | 1 | 5 |
| Aboufarrag et al. 2022 | 1 | 1 | 1 | 1 | 1 | 5 |

---

**Supplementary Table 2. Subgroup analysis for the effect of anthocyanin supplementation on blood lipids.**

| Subgroup                        | Triglyceride |                         |                         | Total-cholesterol |                         |                       | LDL-cholesterol |                         |                       | HDL-cholesterol |                         |          |
|---------------------------------|--------------|-------------------------|-------------------------|-------------------|-------------------------|-----------------------|-----------------|-------------------------|-----------------------|-----------------|-------------------------|----------|
|                                 | (n)          | Effect size<br>(95% CI) | I <sup>2</sup> a<br>(%) | (n)               | Effect size<br>(95% CI) | I <sup>2</sup><br>(%) | (n)             | Effect size<br>(95% CI) | I <sup>2</sup><br>(%) | (n)             | Effect size<br>(95% CI) | I<br>(%) |
| <b>Overall</b>                  | 47           | -0.10 (-0.18, -0.01)    | 34                      | 50                | -0.06 (-0.12, 0.01)     | 28                    | 45              | -0.16 (-0.26, -0.07)    | 38                    | 49              | 0.42 (0.20, 0.65)       | 8        |
| <b>Dyslipidemia<sup>b</sup></b> |              |                         |                         |                   |                         |                       |                 |                         |                       |                 |                         |          |
| Normal                          | 18           | -0.16 (-0.36, 0.05)     | 56                      | 19                | 0.19 (-0.11, 0.15)      | 0                     | 16              | 0.01 (-0.13, 0.15)      | 0                     | 18              | 1.00 (0.42, 1.57)       | 9        |
| higher                          | 27           | -0.09 (-0.15, 0.02)     | 0                       | 30                | -0.10 (-0.22, 0.01)     | 49                    | 28              | -0.25 (-0.37, -0.12)    | 47                    | 30              | 0.19 (0.06, 0.31)       | 5        |
| p-value <sup>c</sup>            |              | 0.657                   |                         |                   | 0.379                   |                       |                 | 0.027                   |                       |                 | 0.020                   |          |

a. Overall test for heterogeneity within subgroups by random effect model.

b. Normal, baseline total cholesterol < 200 mg/dl; Higher, baseline total cholesterol ≥200 mg/dl; Excluding one or two study that total cholesterol level was not presented at baseline.

c. Test for subgroup difference by random effect model.

**Supplementary Table 3. Results after adjustment for funnel plot asymmetry using the trim and fill method**

|                                     | LDL-cholesterol |                      |                                 | HDL-cholesterol |                      |                    |
|-------------------------------------|-----------------|----------------------|---------------------------------|-----------------|----------------------|--------------------|
|                                     | k <sup>1</sup>  | Effect size (95% CI) | I <sup>2</sup> (%) <sup>2</sup> | k               | Effect size (95% CI) | I <sup>2</sup> (%) |
| Overall                             | 45              | -0.16 (-0.26, -0.07) | 38                              | 49              | 0.42 (0.20, 0.65)    | 81                 |
| Trim and fill                       | 59              | -0.30 (-0.40, -0.20) | 55                              | 49              | 0.42 (0.20, 0.65)    | 81                 |
| Trim and fill with outliers removed | 53              | -0.23 (-0.30, -0.15) | 14                              | 52              | 0.33 (0.23, 0.43)    | 51                 |
| Outliers removed                    | 41              | -0.13 (-0.21, -0.05) | 0                               | 39              | 0.20 (0.10, 0.30)    | 31                 |

<sup>1</sup>Number of studies combined

<sup>2</sup>Overall test for heterogeneity within subgroups by random effect model

**Supplementary Table 4. Distribution of adverse events**

| <b>Study</b>           | <b>Reported adverse events<br/>(treatment group)</b>                                        | <b>Reported adverse events<br/>(placebo)</b>                                                                                                                                |
|------------------------|---------------------------------------------------------------------------------------------|-----------------------------------------------------------------------------------------------------------------------------------------------------------------------------|
| Murkovic et al. 2004   | No                                                                                          | No                                                                                                                                                                          |
| Hansen et al. 2005     | NI                                                                                          | NI                                                                                                                                                                          |
| Zern et al. 2005       | NI                                                                                          | NI                                                                                                                                                                          |
| Cerda' et al. 2006     | NI                                                                                          | NI                                                                                                                                                                          |
| Karlsen et al. 2007    | NI                                                                                          | NI                                                                                                                                                                          |
| Erlund et al. 2008     | NI                                                                                          | NI                                                                                                                                                                          |
|                        | No                                                                                          | Anal irritation (1) <sup>1</sup> ,<br>recurrence of previously<br>undisclosed condition (1) <sup>1</sup> ,<br>lump found in routine breast<br>scan (1) <sup>1</sup>         |
| Curtis et al. 2009     |                                                                                             |                                                                                                                                                                             |
| Qin et al. 2009        | No                                                                                          | No                                                                                                                                                                          |
| Basu et al. 2010       | Nausea, vomiting, constipation,<br>and diarrhea (9) <sup>1</sup>                            | No                                                                                                                                                                          |
| Stull et al. 2010      | NI                                                                                          | NI                                                                                                                                                                          |
| Basu et al. 2011       | NI                                                                                          | NI                                                                                                                                                                          |
| Dohadwala et al. 2011  | NI                                                                                          | NI                                                                                                                                                                          |
| Zhu et al. 2011        | No                                                                                          | No                                                                                                                                                                          |
|                        | Diarrhea (1) <sup>1</sup>                                                                   | No                                                                                                                                                                          |
| Hassellund et al. 2013 | Minor headache (3), dark stools<br>(2), nausea (1)                                          |                                                                                                                                                                             |
| Riso et al. 2013       | NI                                                                                          | NI                                                                                                                                                                          |
| Flammer et al. 2013    | NI                                                                                          | NI                                                                                                                                                                          |
| Wright et al. 2013     | NI                                                                                          | NI                                                                                                                                                                          |
| Zhu et al. 2013        | No                                                                                          | No                                                                                                                                                                          |
| Basu et al. 2014       | No                                                                                          | No                                                                                                                                                                          |
| Lynn et al. 2014       | No                                                                                          | No                                                                                                                                                                          |
| Soltani et al. 2014    | No                                                                                          | No                                                                                                                                                                          |
| Li et al., 2015        | No                                                                                          | No                                                                                                                                                                          |
| Novotny et al. 2015    | NI                                                                                          | NI                                                                                                                                                                          |
| Soltani et al. 2015    | No                                                                                          | No                                                                                                                                                                          |
| Stull et al. 2015      | NI                                                                                          | NI                                                                                                                                                                          |
| Zhang et al. 2015      | No                                                                                          | No                                                                                                                                                                          |
|                        | Colds (2), headaches (2),<br>bruising (1), menstrual pain (1),<br>enteritis (1), ulitis (1) | Colds (1), diarrhea (1),<br>muscular pain (1),<br>Otitis (1), laryngitis (1),<br>fatigue (1), xerophthalmia<br>(1), rash (1), conjunctivitis<br>(1), possible hepatitis (1) |
| Lee et al. 2016        |                                                                                             |                                                                                                                                                                             |
| Zhang et al. 2016      | No                                                                                          | No                                                                                                                                                                          |
| Xie et al. 2017        | NI                                                                                          | NI                                                                                                                                                                          |
| Yang et al. 2017b      | Treatment group (7), placebo (3): dark stool (5), insomnia (1),                             |                                                                                                                                                                             |

| <b>Study</b>           | <b>Reported adverse events<br/>(treatment group)</b>                                                                    | <b>Reported adverse events<br/>(placebo)</b>                                  |
|------------------------|-------------------------------------------------------------------------------------------------------------------------|-------------------------------------------------------------------------------|
|                        | abdominal pain (1), diarrhea (1), dizziness (1), skin rash (1), withdrawal (4) <sup>1</sup> : treatment (1) placebo (3) |                                                                               |
| Hollands et al. 2018   | No                                                                                                                      | No                                                                            |
| Kim et al. 2018        | NI                                                                                                                      | NI                                                                            |
| Bakuradze et al. 2019  | NI                                                                                                                      | NI                                                                            |
| Curtis et al. 2019     | serious adverse events (1) <sup>1</sup>                                                                                 | No                                                                            |
| Guo et al. 2020        | No                                                                                                                      | No                                                                            |
| Stote et al. 2020      | No                                                                                                                      | No                                                                            |
| Chan et al. 2021       | Dark green stool (50%),<br>poor sleeping, mild headache                                                                 | No                                                                            |
| Sekikawa et al. 2021   | No                                                                                                                      | No                                                                            |
| Xu et al. 2021         | Dark stool (9), insomnia (1),<br>diarrhea (1), dizziness (2), skin<br>rash (1)                                          | Dark stool (1), insomnia (1),<br>abdominal (1), dizziness (1)                 |
| Yang et al. 2021       | Dizziness (1), insomnia (1),<br>dark stool (5)                                                                          | Diarrhea (1) <sup>1</sup> , abdominal<br>pain (1), skin rash (1) <sup>1</sup> |
| Aboufarrag et al. 2022 | No                                                                                                                      | No                                                                            |

<sup>1</sup>Withdrawal
