# Supplementary material for: Effects of anthocyanin supplementation on blood lipid levels: a systematic review and meta-analysis
Source: PubMed Central journal article supplement (PMC10463756; doi:10.3389/fnut.2023.1207751), 2023-08-15
Supplement: Data_Sheet_2.pdf [file Data_Sheet_2.pdf]

*Supplementary Material*

**Effects of Anthocyanin Supplementation on Blood Lipid Levels: A  
Systematic Review and Meta-Analysis**

**Hwan-Hee Jang, In-Guk Hwang, Young-Min Lee\***

\* **Correspondence:** Young-Min Lee: [ymlee@ginue.ac.kr](mailto:ymlee@ginue.ac.kr)

**1. Supplementary Figures**

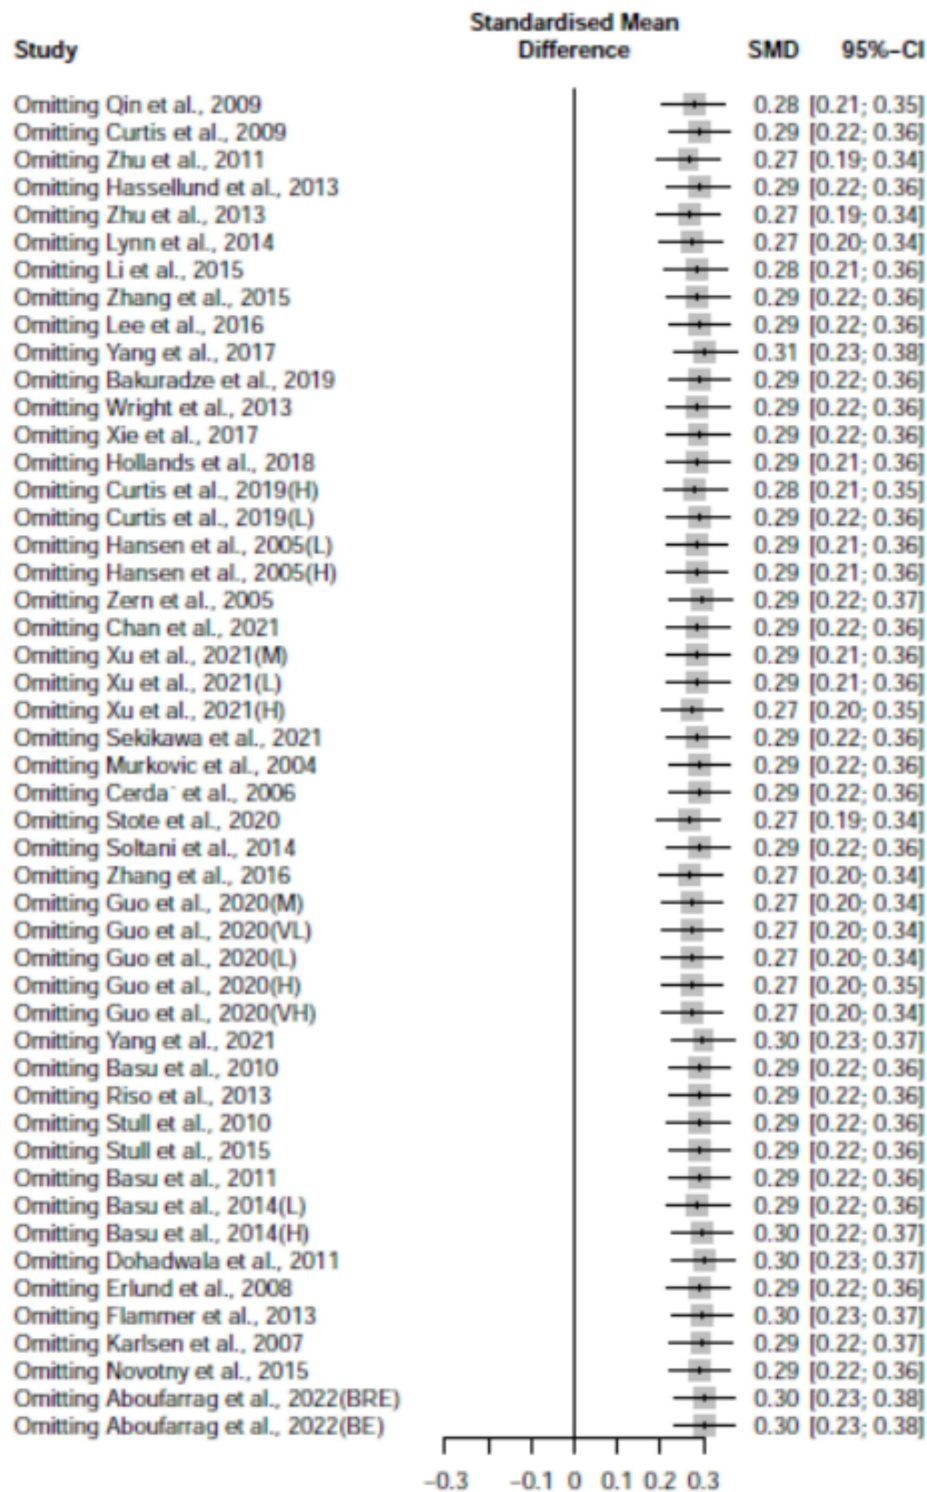

Supplementary Figure 1. Sensitivity analysis: high-density lipoprotein-cholesterol

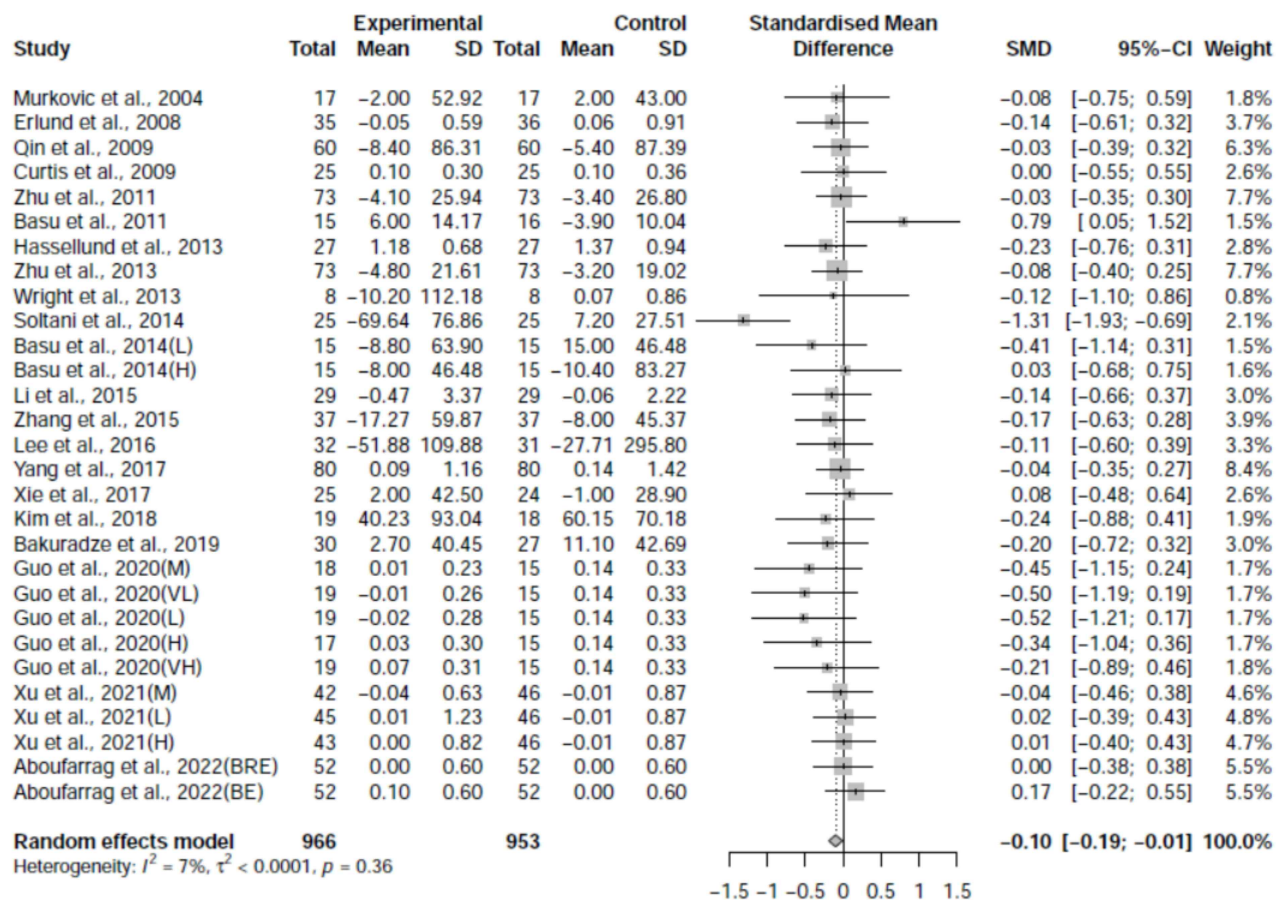

Supplementary Figure 2. Forest plot: Triglycerides

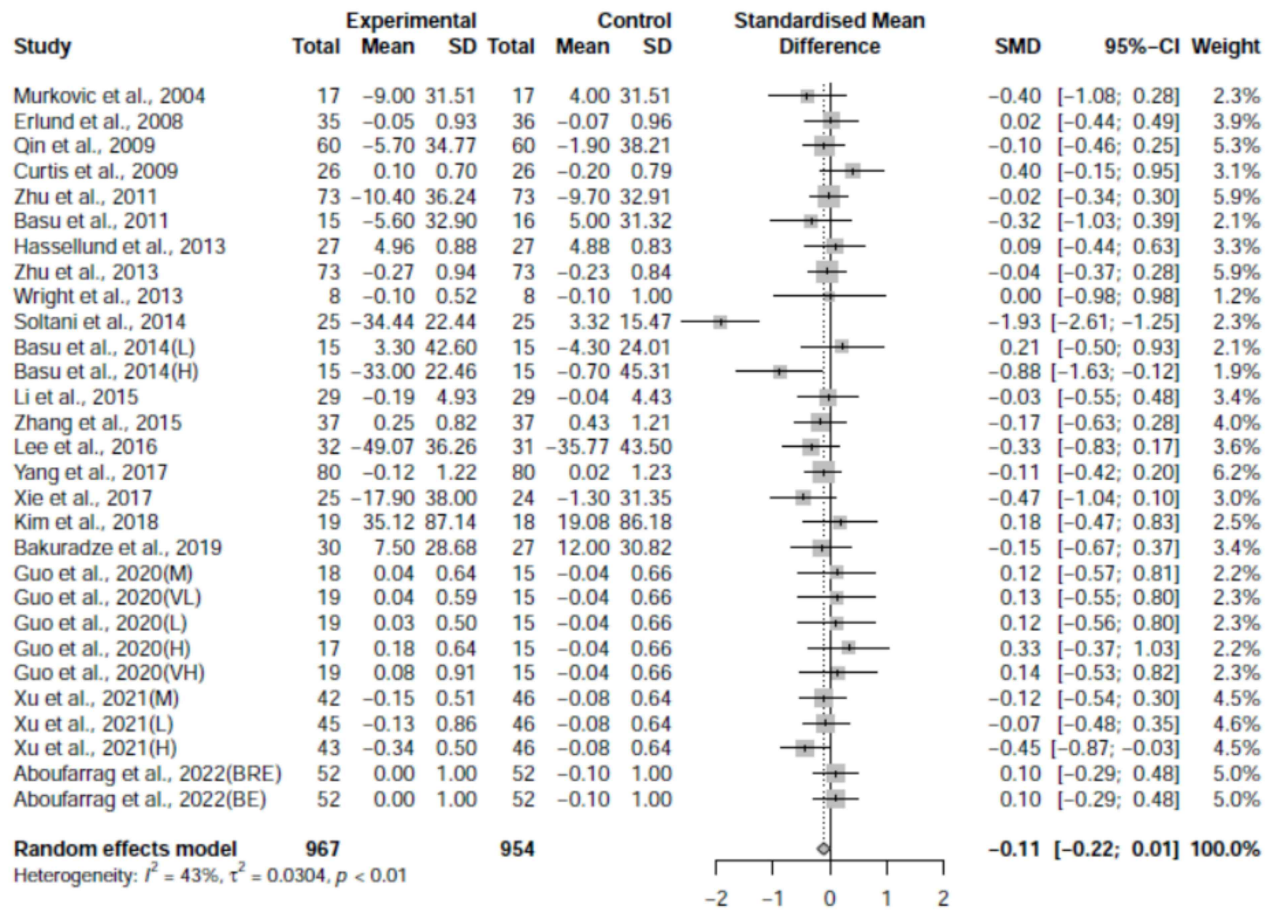

Supplementary Figure 3. Forest plot: total cholesterol



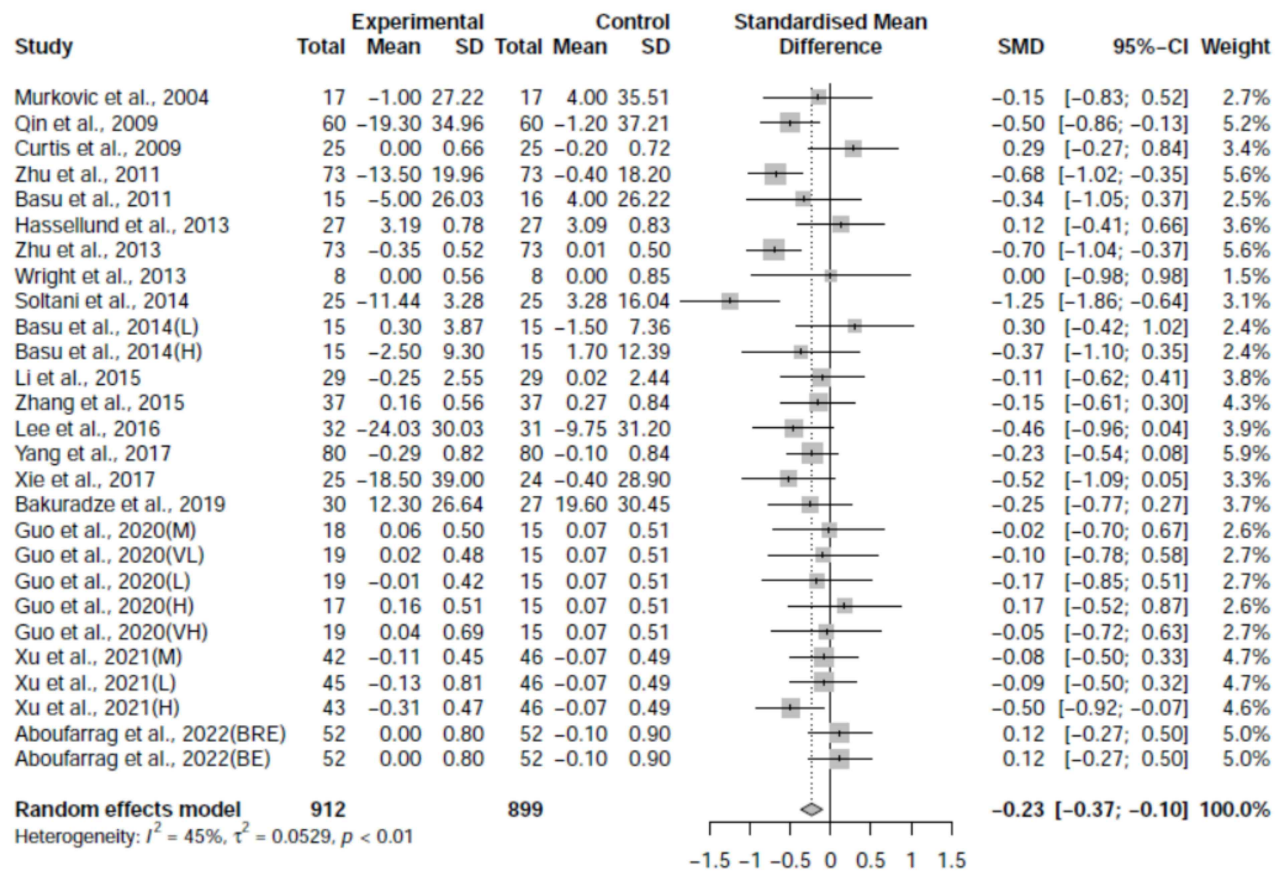

**Supplementary Figure 4.** Forest plot: low-density lipoprotein-cholesterol

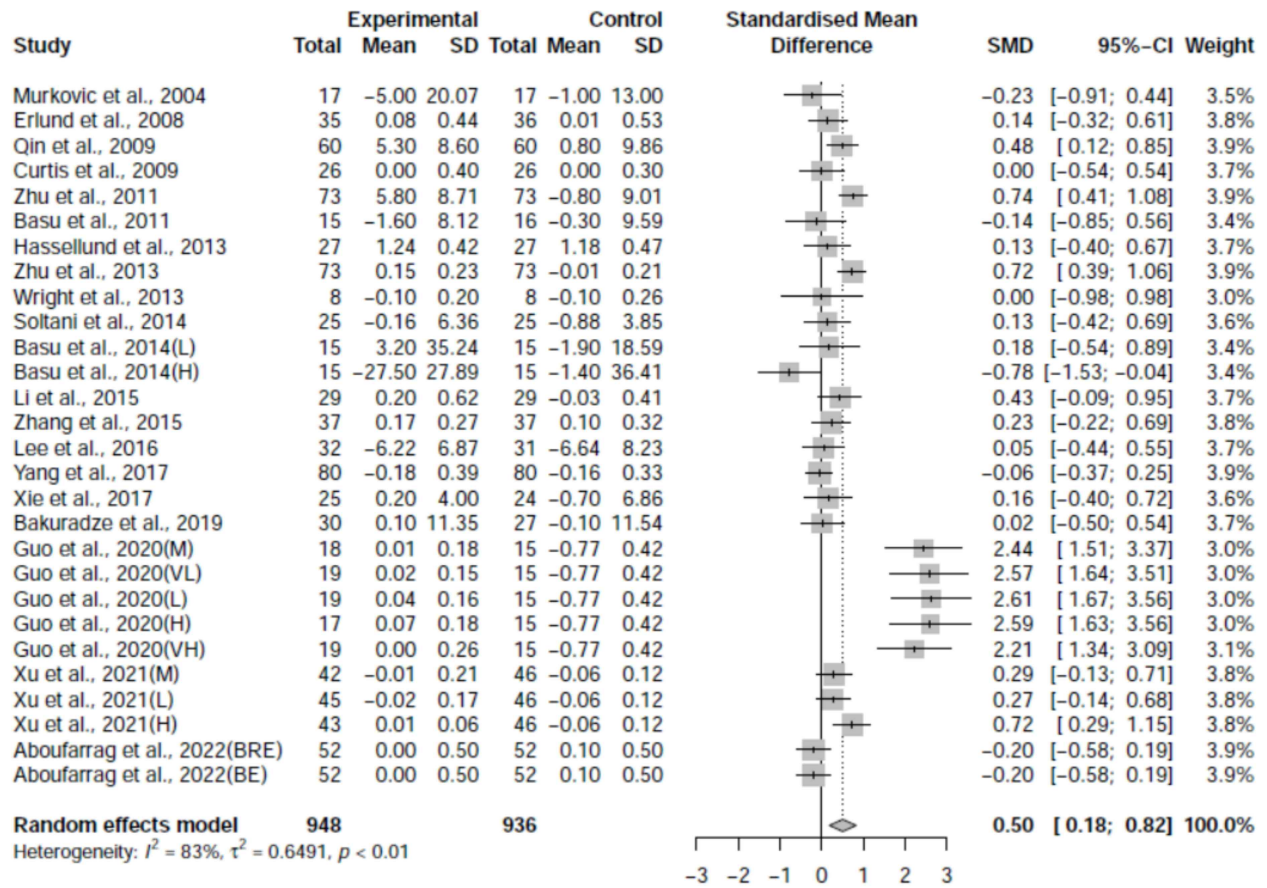

Supplementary Figure 5. Forest plot: high-density lipoprotein-cholesterol

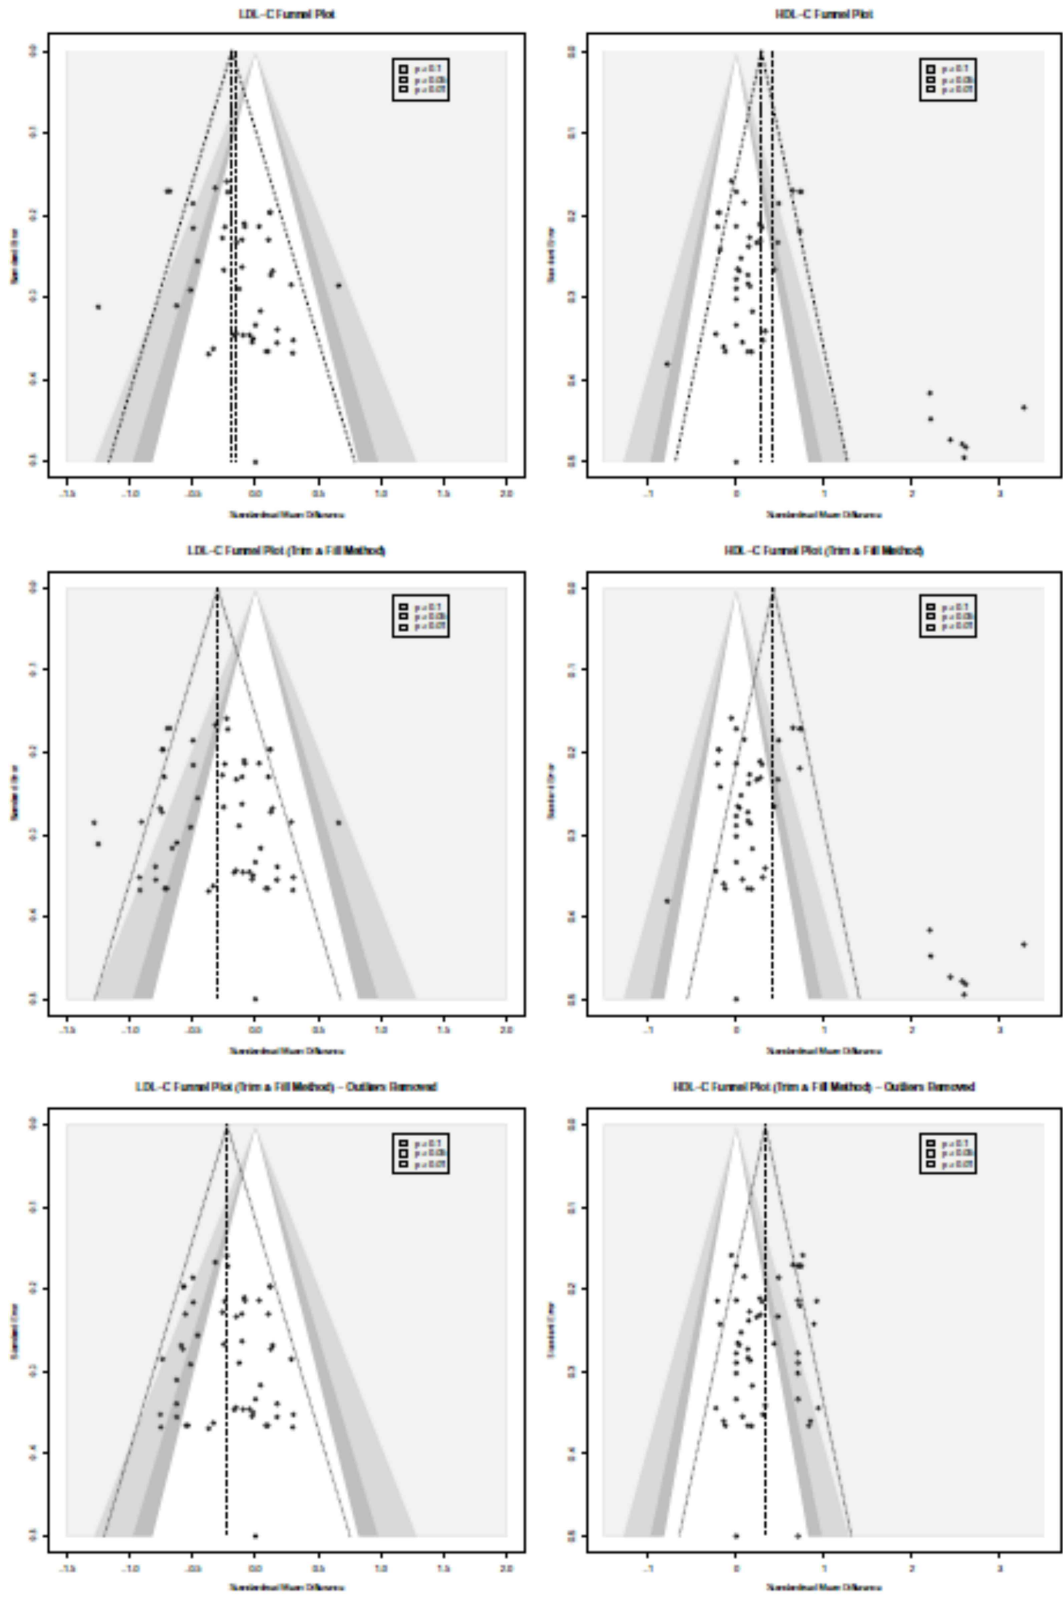

Supplementary Figure 6. Funnel plot for publication bias
